# Supplementary material for: Application of Weighted Gene Coexpression Network Analysis to Identify Key Modules and Hub Genes in Systemic Juvenile Idiopathic Arthritis
Source: Biomed Res Int. 2021 Aug 13;2021:9957569. doi: 10.1155/2021/9957569 (PMC8382540; doi:10.1155/2021/9957569)
Supplement: Supplementary Materials — Supplementary 1 Figure S1: sample clustering to detect outliers. Figure S2: analysis of network topology for various soft-thresholding powers. Figure S3: construction of the consensus WGCNA. Figure S4: bar plot of mean gene significance across modules. Figure S5A-S5C: interactions between module hub genes and genome-wide-associated genes. Table S1: analysis of network topology for various soft-thresholding powers. Table S2: the number of genes in each module. Table S3: the GO and KEGG pathway enrichment analysis of the red module. Table S4: the GO and KEGG pathway enrichment analysis of the green-yellow module. Table S5: the hub genes in the red module. Table S6: the hub genes in the green-yellow module. Table S7: the GO enrichment analysis of hub genes in red and green-yellow module. Supplementary 2 WGCNA codes. [file 9957569.f1.zip]

Archive with 2 entries (2 files):
- 9957569.f1/Supplementary1_simple figure and table_ updated.docx
- 9957569.f1/Supplementary2_codes_updated.docx
